# Supplementary material
Source: Royal Society of Chemistry journal article supplement (doi:10.1039/d6cc01418f)
Supplement: d6cc01418f1.pdf [file d6cc01418f1.pdf]

# 1 **Balancing Sodiophilicity and Mechanical Stability: Sn-Engineered** 2 **Multicomponent Alloy Interfaces for Anode-Free Sodium Metal Batteries**

3 Yuju Qi,<sup>[a]</sup> Zewei Hu,<sup>[a]</sup> Haiying Lu,<sup>[a]</sup> Zhenwei Tang,<sup>[a]</sup> Jiayao Wang,<sup>[a]</sup> Chao Han,<sup>[b]</sup> Weijie Li\*<sup>[a]</sup>

---

4 [a] Y. Qi, Z. Hu, H. Lu, Z. Tang, J. Wang, W. Li

5 Powder Metallurgy Research Institute

6 Central South University

7 Changsha, 410083, China

8 E-mail: li-306@csu.edu.cn

9 [b] C Han

10 School of Materials Sciences and Engineering

11 Central South University

12 Changsha, 410083, China

13

## 1 1. Experimental Section

### 2 1.1 Material synthesis

3 MA-Sn<sub>0.2</sub>, MA-Sn<sub>0.4</sub>, MA-Sn<sub>0.6</sub>, MA-Sn<sub>0.8</sub>, and MA-Sn<sub>1</sub> were prepared at room temperature using a coprecipitation strategy.  
4 In a typical synthesis, 4 mmol of Na<sub>4</sub>[Fe(CN)<sub>6</sub>] and 85 mmol of NaCl were dissolved in 50 mL of deionized water to give  
5 solution A. In parallel, 0.5 mmol of SnCl<sub>2</sub> together with a total of 2 mmol of transition-metal precursors (FeCl<sub>2</sub>·4H<sub>2</sub>O,  
6 NiCl<sub>2</sub>·6H<sub>2</sub>O, CuCl<sub>2</sub>·2.5H<sub>2</sub>O, and CoCl<sub>2</sub>·6H<sub>2</sub>O, 0.5 mmol each) were dissolved in another 50 mL of deionized water to form  
7 solution B. Both solutions were magnetically stirred for 30 min. Afterwards, solution A was added dropwise into solution B  
8 under continuous stirring, affording a mixed suspension (solution C). The mixture was allowed to react for 2 h, after which  
9 the solid product was isolated by centrifugation, washed repeatedly with deionized water, and finally redispersed in 40 mL of  
10 deionized water under ultrasonication to obtain solution D. In a separate step, 0.2 g of CNTs were dispersed in deionized water  
11 by ultrasonic treatment. Subsequently, 5 mL of solution D was introduced into the CNT dispersion, and the mixture was  
12 ultrasonicated for 1 h to promote uniform loading. The resulting suspension was filtered under vacuum, and the collected solid  
13 was dried at 60 °C. The dried precursor was gently ground, spread uniformly in a quartz boat, and subjected to thermal  
14 treatment in a tube furnace: the temperature was increased to 800 °C at 5 °C min<sup>-1</sup> under flowing Ar and maintained for 2 h.  
15 The final product obtained under these conditions was designated as MA-Sn<sub>0.2</sub>. The MA-Sn<sub>0</sub>, MA-Sn<sub>0.4</sub>, MA-Sn<sub>0.6</sub>, MA-Sn<sub>0.8</sub>,  
16 and MA-Sn<sub>1</sub> samples were synthesized following the same protocol, with the Sn content adjusted to the desired level.

### 17 1.2 Preparation of electrode

18 The as-prepared active materials and PVDF binder were first blended and ground thoroughly at a mass ratio of 8:2. A suitable  
19 amount of N-methyl-2-pyrrolidone (NMP) was then introduced to obtain a uniform slurry, which was subsequently deposited  
20 onto aluminum foil using an ultrasonic spray-coating process.

### 21 1.3 Preparation of Na<sub>3</sub>V<sub>2</sub>(PO<sub>4</sub>)<sub>3</sub> cathode

22 Na<sub>3</sub>V<sub>2</sub>(PO<sub>4</sub>)<sub>3</sub> powder, CNTs, and PVDF binder were first combined in a mass ratio of 8:1:1 and thoroughly ground to obtain a  
23 uniform mixture. A suitable amount of N-methyl-2-pyrrolidone (NMP) was then added to prepare a well-dispersed slurry,  
24 which was evenly applied onto a carbon-coated aluminum foil current collector. After drying, the resulting electrodes were  
25 punched into 10 mm-diameter discs for subsequent measurements.

## 26 2. Materials Characterization

27 A field-emission scanning electron microscope (FE-SEM, JEOL JSM-6700) equipped with an energy-dispersive X-ray  
28 spectroscopy (EDS) detector was employed to examine the morphologies and elemental distributions of MA-Sn<sub>0.2</sub>,  
29 MA-Sn<sub>0.4</sub>, MA-Sn<sub>0.6</sub>, MA-Sn<sub>0.8</sub>, and MA-Sn<sub>1</sub>. X-ray diffraction (XRD) patterns were recorded on a Bruker D8  
30 diffractometer using Cu K $\alpha$  radiation at a scan rate of 10° min<sup>-1</sup>. The microstructures of MA-Sn<sub>0.2</sub> and MA-Sn<sub>1</sub> were further  
31 investigated by transmission electron microscopy (TEM, JEOL 4000EX). In situ visualization of Na deposition on MA-Sn<sub>0.2</sub>,  
32 MA-Sn<sub>0.4</sub>, MA-Sn<sub>0.6</sub>, MA-Sn<sub>0.8</sub>, and MA-Sn<sub>1</sub> substrates was performed using an optical microscope (Star-micro T2-M100)  
33 under a constant deposition current density of 1 mA cm<sup>-2</sup>. The carbon content was analyzed using a thermogravimetric  
34 analyzer (TGA, METTLER Toledo TGA-DSC 3+) at a heating rate of 10 °C min<sup>-1</sup>.

## 35 3. Electrochemical Measurements

1 All 2032-type coin cells were fabricated in a high-purity Ar glove box, where the concentrations of H<sub>2</sub>O and O<sub>2</sub> were both  
2 maintained below 0.1 ppm. Galvanostatic tests were performed on a Neware multichannel battery tester  
3 (CT-4008Tn-5V10mA-HWX, Shenzhen, China). Unless otherwise stated, 1 M NaPF<sub>6</sub> in diglyme (G2) was used as the  
4 electrolyte for the Na-based cells. Asymmetric cells were configured with a Na metal foil (14 mm in diameter) as the  
5 counter/reference electrode and MA-Sn<sub>x</sub> (x = 0.2-1) discs (16 mm in diameter) as the working electrodes. A polypropylene  
6 separator (Celgard 2500) and 50 μL of electrolyte were employed in each cell. The long-term Coulombic efficiency (CE) was  
7 determined by repeatedly stripping Na at current densities of 1 and 2 mA cm<sup>-2</sup> to a fixed areal capacity of 1 mAh cm<sup>-2</sup>, followed  
8 by plating back until the cell voltage reached 0.5 V. For symmetric cells, a defined amount of Na was first electrodeposited  
9 onto the MA-Sn<sub>x</sub> substrates to obtain Na/MA-Sn<sub>x</sub> electrodes, which were then assembled face-to-face. Their electrochemical  
10 impedance spectra were collected at different temperatures using a 10 mV AC perturbation over a frequency range of 1 MHz-  
11 100 mHz. The activation energy for ion transport was calculated from Arrhenius plots according to  $k=Ae^{-E_a/RT}$ , where k is  
12 the rate constant, R is the gas constant, and T is the absolute temperature. Tafel polarization curves were recorded on an  
13 electrochemical workstation between -0.1 and 0.1 V at a scan rate of 1 mV s<sup>-1</sup>. The Tafel plots were derived from polarization  
14 curves based on the Tafel equation ( $\eta = a + b \log i$ ), where  $\eta$  is the overpotential and i is the current density. The Tafel slope  
15 was obtained from the linear fitting region, and the exchange current density ( $i_0$ ) was determined by extrapolating the fitted  
16 line to zero overpotential. MA-Sn<sub>0.6</sub>||NVP pouch cells were operated within 2.2-3.8 V. They were first activated at a low rate  
17 of 0.05 C and then subjected to cycling at 0.5 C for further performance evaluation.

18

1 4. Supplementary Figures

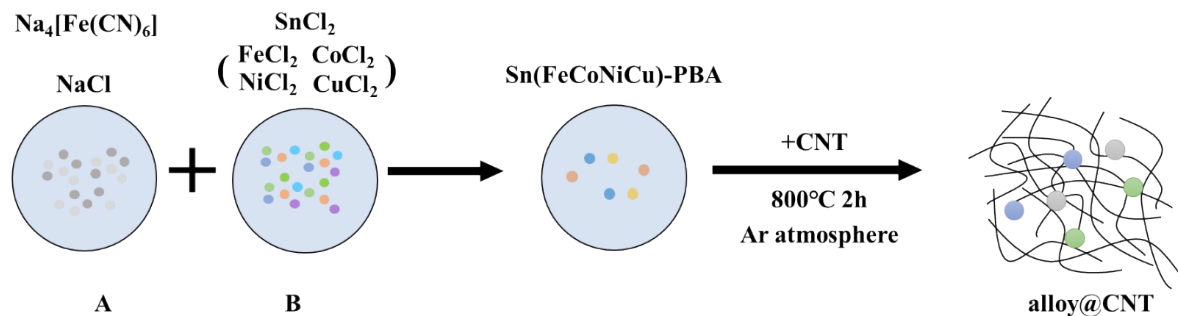

2  
3 Figure S1 The synthesis processes of MA-Sn<sub>0.2</sub>, MA-Sn<sub>0.4</sub>, MA-Sn<sub>0.6</sub>, MA-Sn<sub>0.8</sub>, and MA-Sn<sub>1</sub> materials.

4 Five metal chlorides (Fe, Co, Ni, Cu, Sn) were used as precursors to form Prussian blue analogues via a room-temperature  
5 co-precipitation in aqueous solution. After adding carbon nanotubes (CNTs) and ultrasonic dispersion, the mixture was dried  
6 and thermally reduced in Ar to obtain alloy nanoparticles anchored on CNTs.

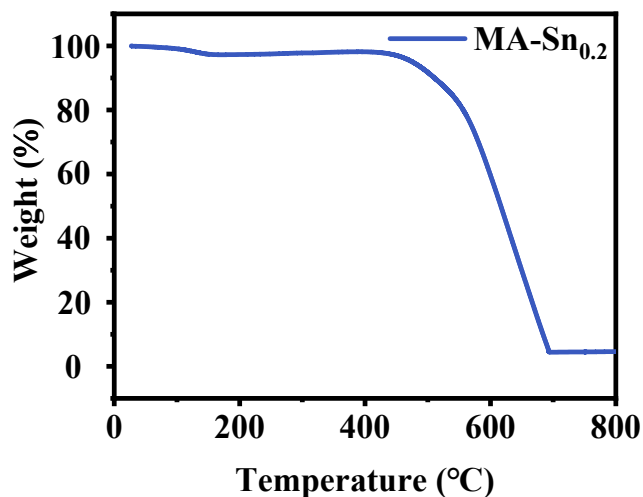

7  
8 Figure S2 TGA of MA-Sn<sub>0.2</sub>.

9  
10 The results of thermogravimetric analysis confirmed that alloy nanoparticles accounted for 5% of the material.

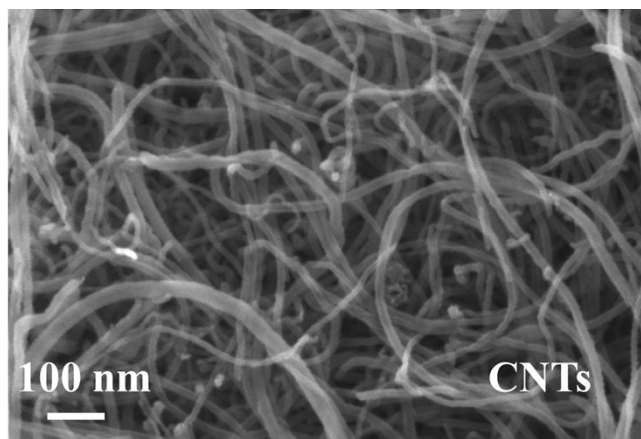

1

2 Figure S3 SEM of CNTs.

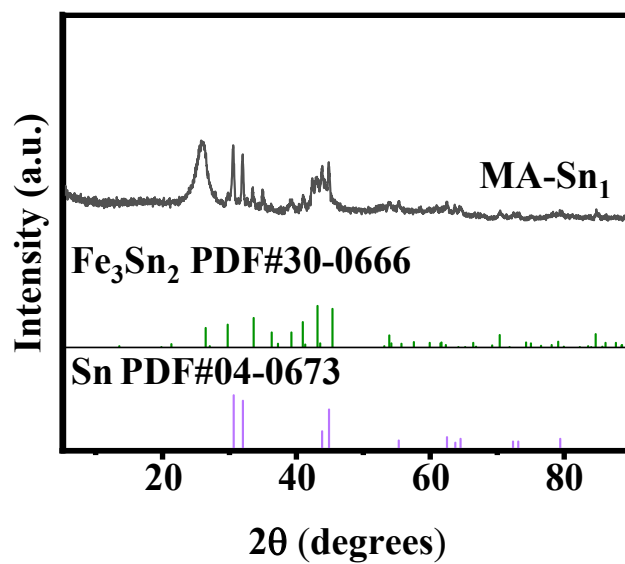

3

4 Figure S4 XRD of MA-Sn<sub>1</sub>.

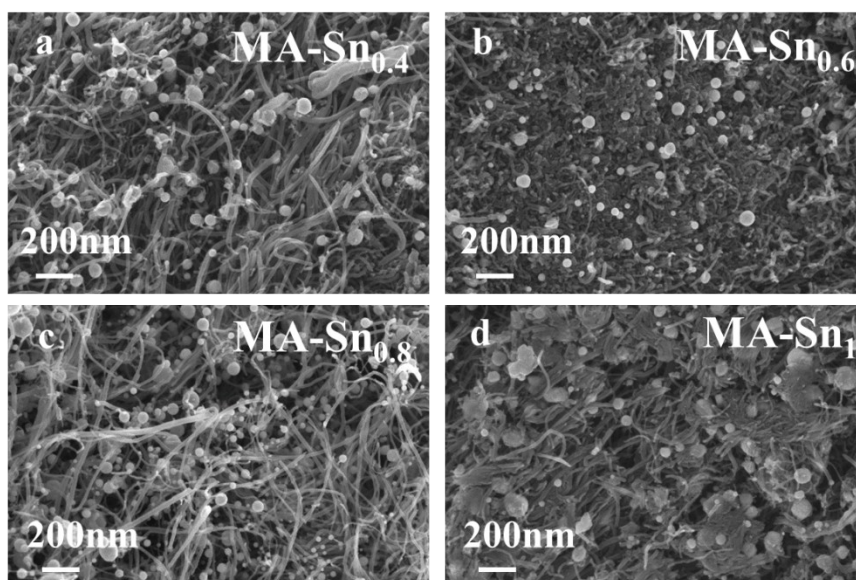

1

2 Figure S5 SEM images of (a) MA-Sn<sub>0.4</sub>, (b) MA-Sn<sub>0.6</sub>, (c) MA-Sn<sub>0.8</sub>, and (d) MA-Sn<sub>1</sub>.

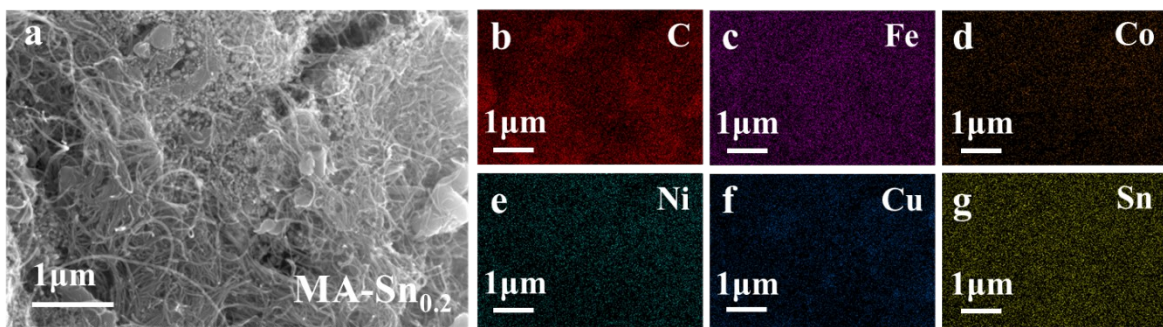

1

2 Figure S6 (a) SEM of MA-Sn<sub>0.2</sub> and corresponding elemental distribution of (b) C, (c) Fe, (d) Co, (e) Ni, (f) Cu, and (g) Sn.

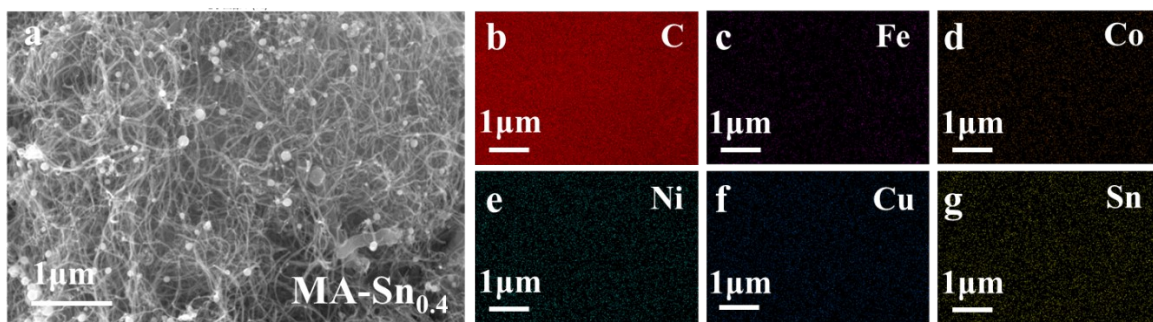

3

4 Figure S7 (a) SEM of MA-Sn<sub>0.4</sub> and corresponding elemental distribution of (b) C, (c) Fe, (d) Co, (e) Ni, (f) Cu, and (g) Sn.

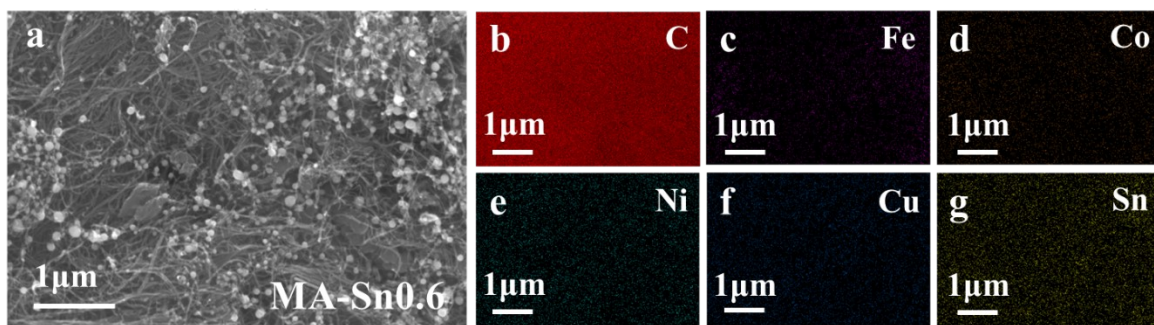

1

2 Figure S8 (a) SEM of MA-Sn<sub>0.6</sub> and corresponding elemental distribution of (b) C, (c) Fe, (d) Co, (e) Ni, (f) Cu, and (g) Sn.

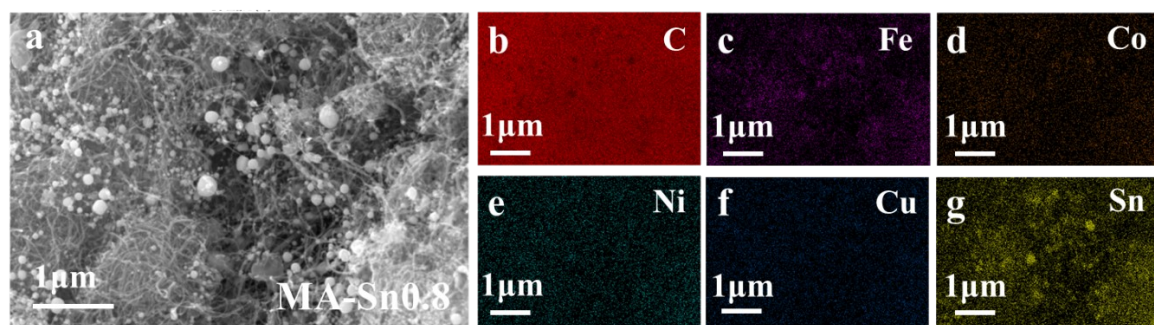

3

4 Figure S9 (a) SEM of MA-Sn<sub>0.8</sub> and corresponding elemental distribution of (b) C, (c) Fe, (d) Co, (e) Ni, (f) Cu, and (g) Sn.

5

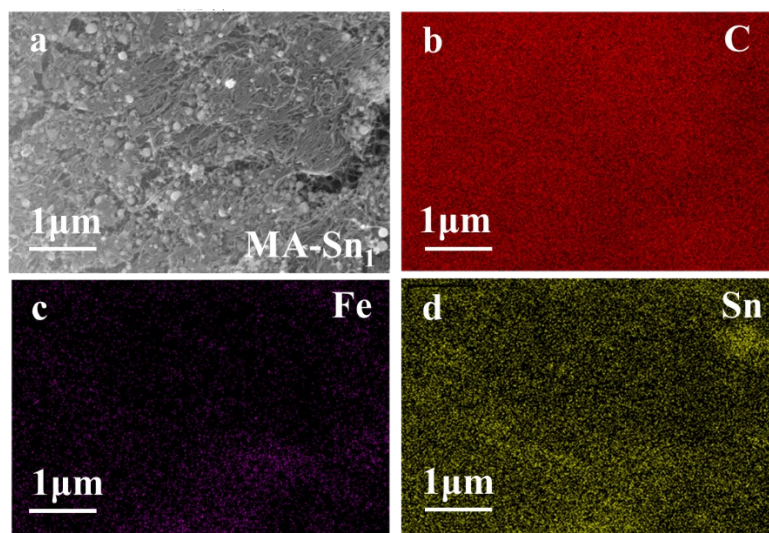

1

2 Figure S10 (a) SEM of MA-Sn<sub>1</sub> and corresponding elemental distribution of (b) C, (c) Fe, (d) Sn.

3

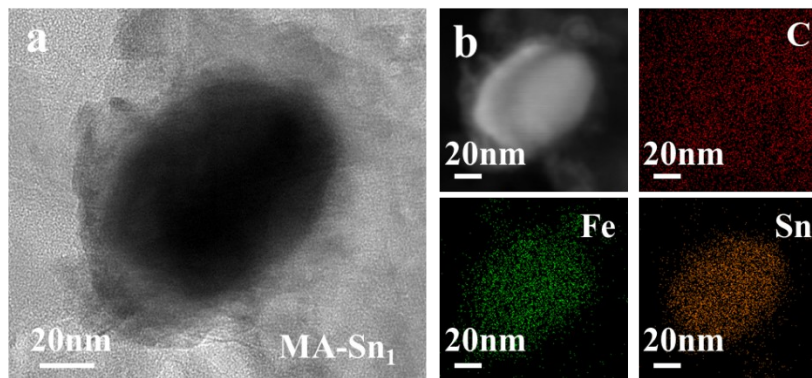

1

2 Figure S11 (a) TEM of MA-Sn<sub>1</sub> and corresponding elemental distribution of (b) C, Fe, and Sn.

3

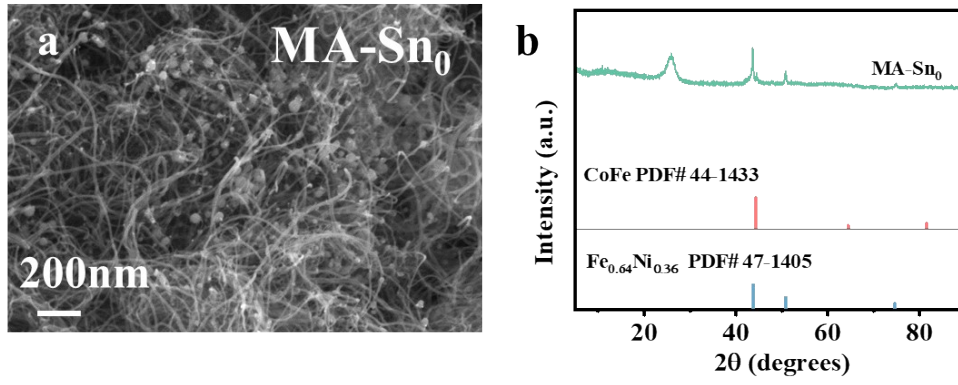

1

2 Figure S12 SEM and XRD of MA-Sn<sub>0</sub>.

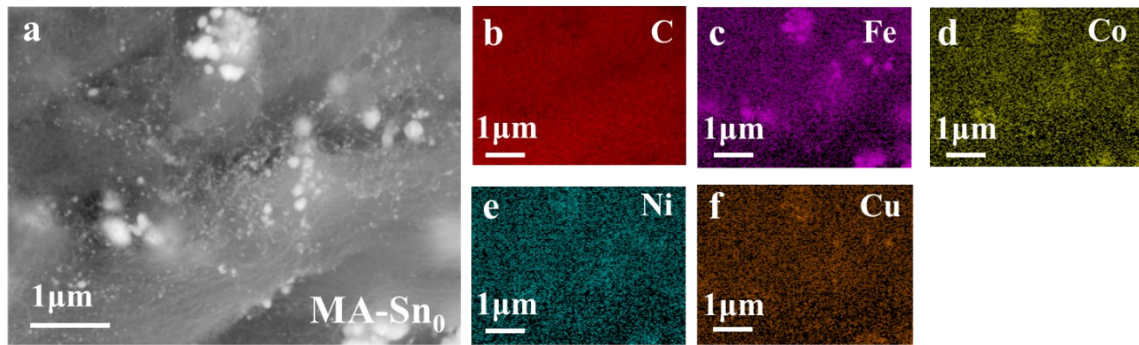

3

4 Figure S13 SEM of MA-Sn<sub>0</sub>.

5

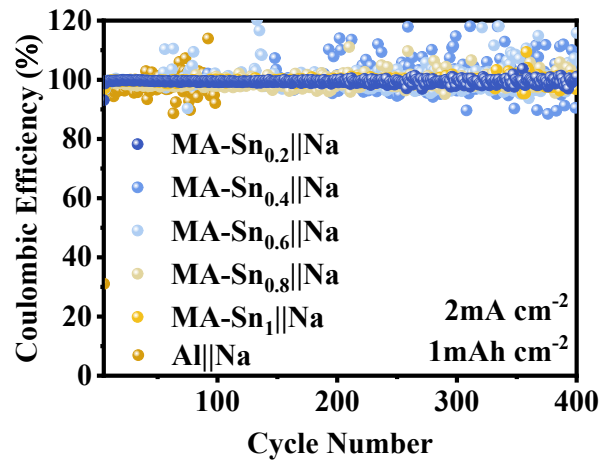

1

2 Figure S14 CE profiles of asymmetric cells at  $2\text{mA cm}^{-2}$  of  $1\text{mAh cm}^{-2}$ .

3 The excellent reproducibility further supports the reliability of the observed performance differences among MA-Sn<sub>x</sub> samples.

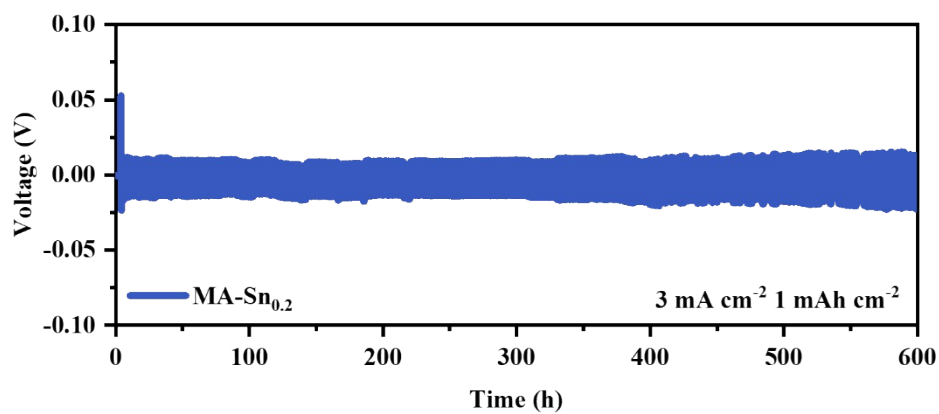

- 1
- 2 Figure S15 Cycling performance of symmetric cells under 3 mA cm<sup>-2</sup> of 1mAh cm<sup>-2</sup>.
- 3 At 3 mA cm<sup>-2</sup> and 1 mAh cm<sup>-2</sup>, it maintains regular voltage profiles for over 600 h.

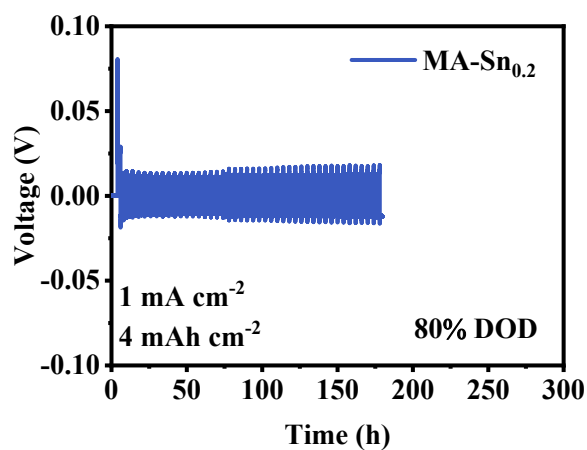

- 4
- 5 Figure S16 Cycling performance of MA-Sn<sub>0.2</sub> symmetric cells at 1 mA cm<sup>-2</sup> of 4 mAh cm<sup>-2</sup>.
- 6 Even under higher DOD conditions, MA-Sn<sub>0.2</sub> maintains relatively stable cycling.

7

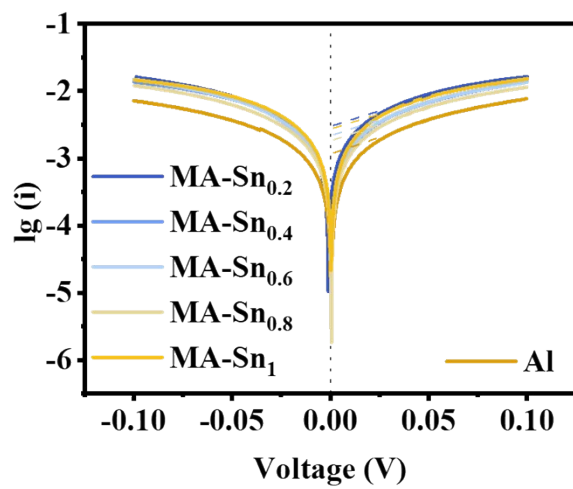

1

2 Figure S17 Tafel profile of different substrates.

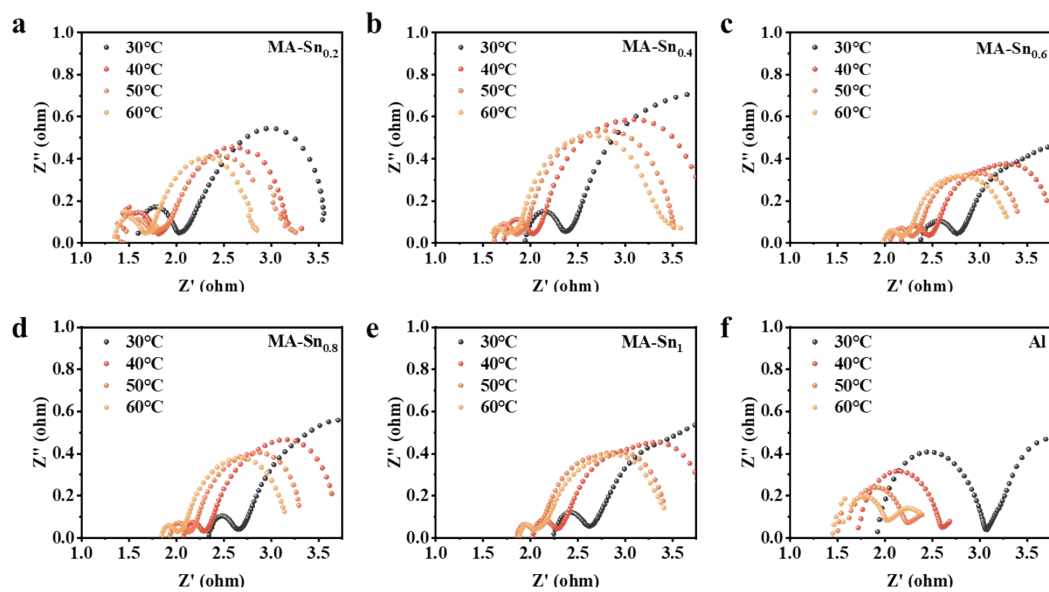

1

2 Figure S18 The EIS spectra of symmetric cells at different temperatures.

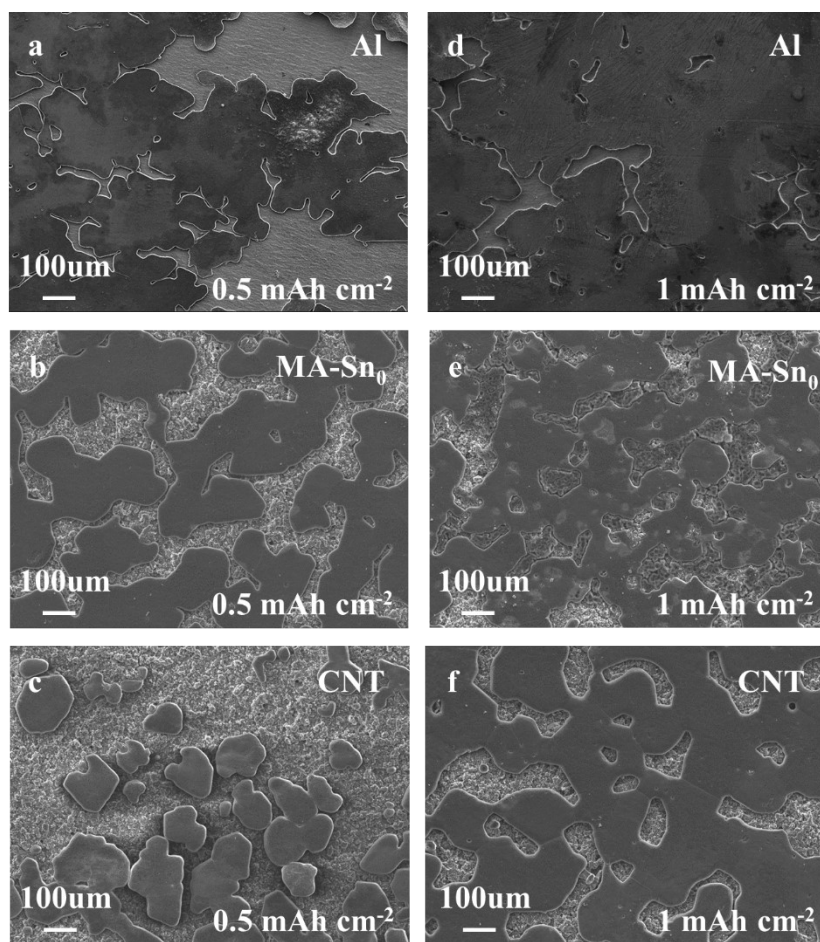

1

2 Figure S19 SEM images of (a, d) Al, (b, e) MA-Sn<sub>0</sub>, and (c, f) CNT current collector with different Na deposition capacities.

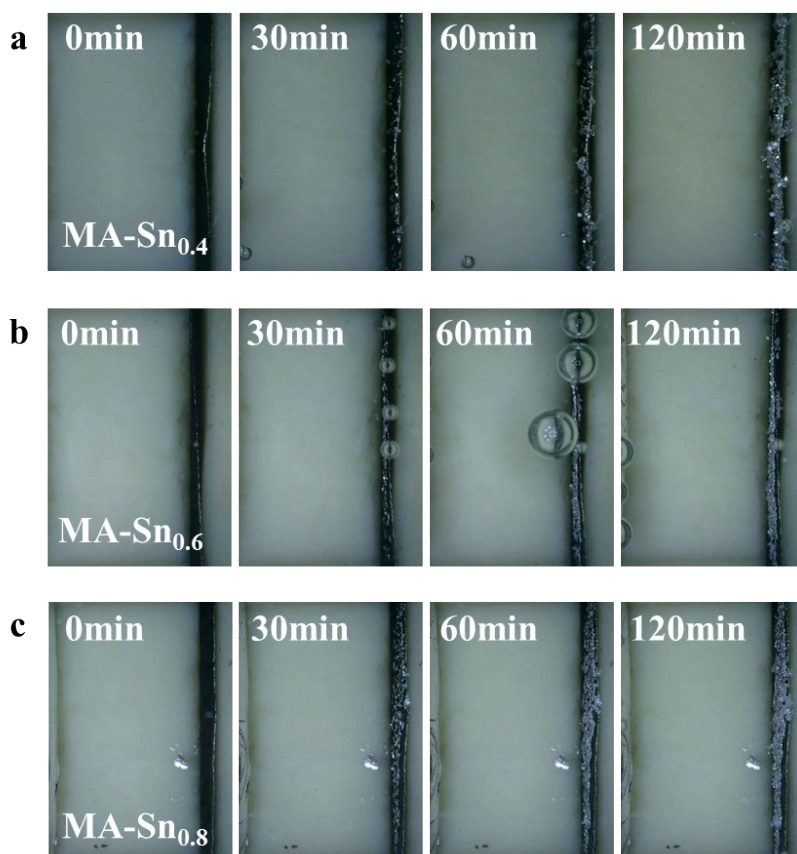

1

2 Figure S20 In-situ optical microscopy observations of the Na plating process on the (a) MA-Sn<sub>0.4</sub>, (b) MA-Sn<sub>0.6</sub>, and (c) MA-  
3 Sn<sub>0.8</sub>.

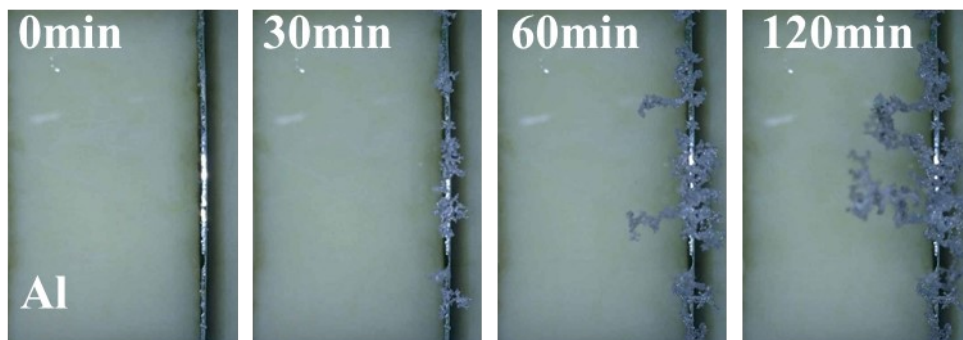

- 1
- 2 Figure S21 In-situ optical microscopy observations of the Na plating process on the Al.

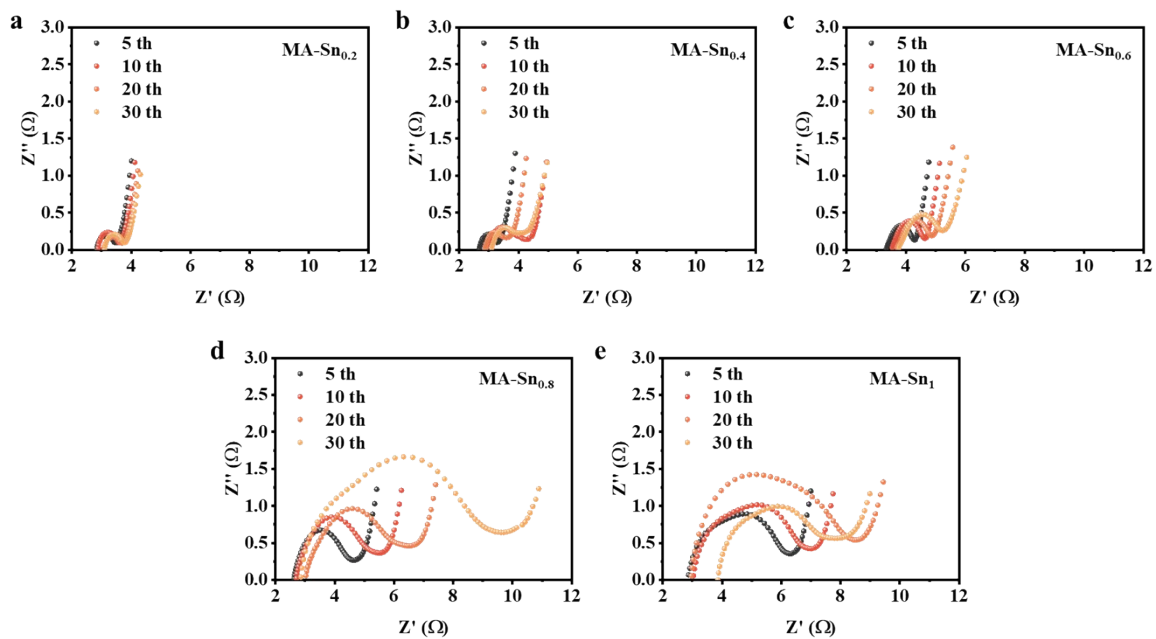

1  
 2 Figure S22 The EIS spectra of asymmetric cells at different cycles.

3

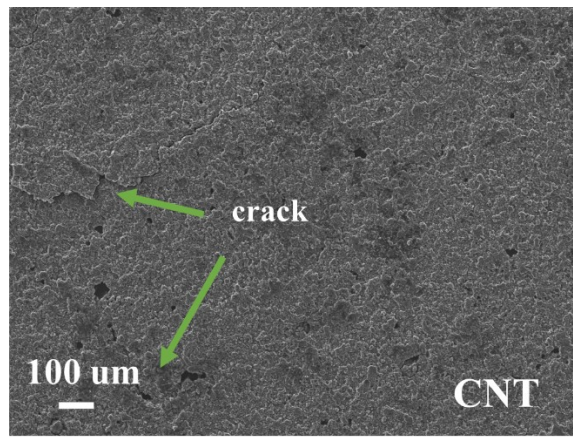

1

2 Figure S23 SEM of CNT after cycling.

3

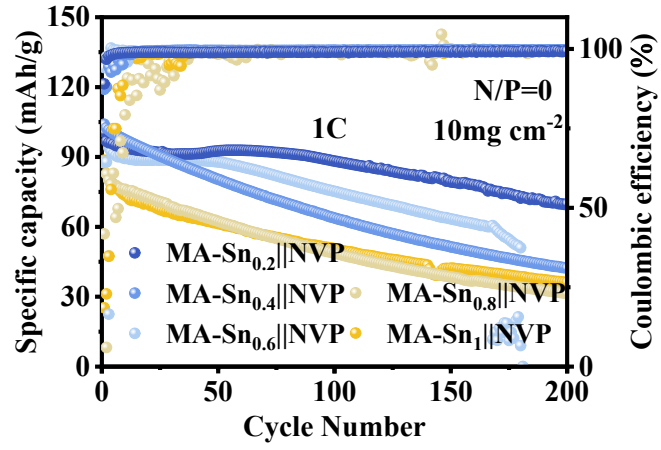

1

2 Figure S24 Cycling performance of MA-Sn<sub>x</sub>||NVP (x = 0.2, 0.4, 0.6, 0.8, and 1) anode-free cells at 1 C.

3

4 Even at a high cathode loading of 10 mg cm<sup>-2</sup>, MA-Sn<sub>0.2</sub> still delivered superior cycling performance at 1 C.
